# Supplementary material for: Minimally invasive surgery or stenting for left anterior descending artery disease – meta-analysis
Source: PubMed Central journal article supplement (PMC9098394; doi:10.1016/j.ijcha.2022.101046), 2022-05-10

### Appendix 3.1 Short-term cardiac mortality RCT studies

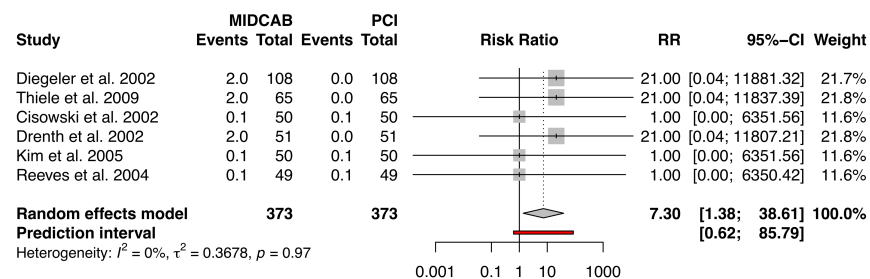

### Appendix 3.2 Mid-term cardiac mortality RCT studies

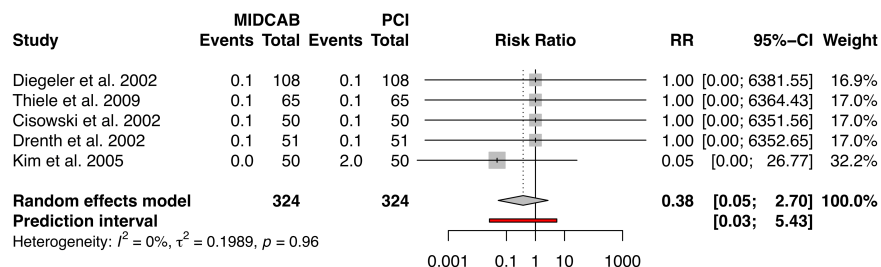

### Appendix 3.3 Long-term cardiac mortality RCT studies

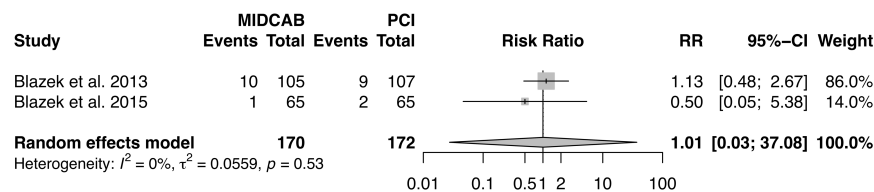

### Appendix 3.4 Short-term cardiac mortality cohort studies

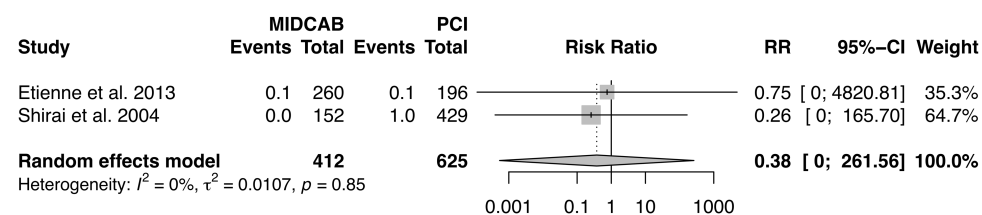

### Appendix 3.5 Long-term cardiac mortality cohort studies

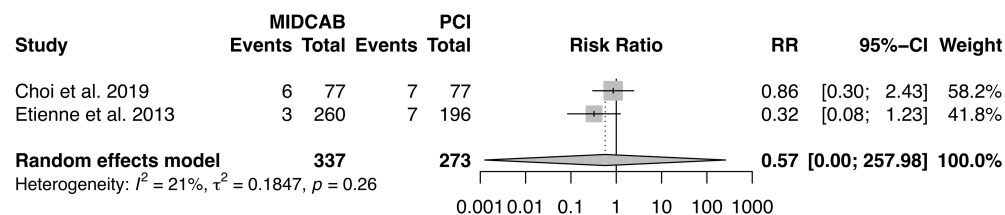

Supplement: mmc3.pdf [file mmc3.pdf]
