# Supplementary material for: Minimally invasive surgery or stenting for left anterior descending artery disease – meta-analysis
Source: PubMed Central journal article supplement (PMC9098394; doi:10.1016/j.ijcha.2022.101046), 2022-05-10

### Appendix 4.1 Short-term myocardial infarction RCT studies

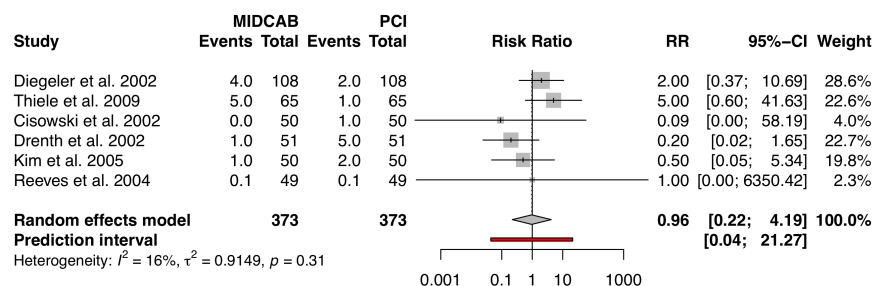

### Appendix 4.2 Mid-term myocardial infarction RCT studies

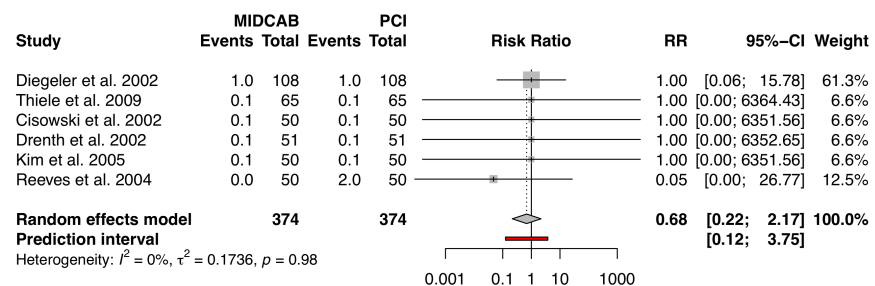

### Appendix 4.3 Long-term myocardial infarction RCT studies

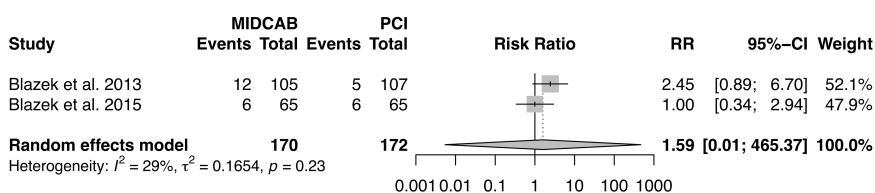

### Appendix 4.4 Short-term myocardial infarction cohort studies

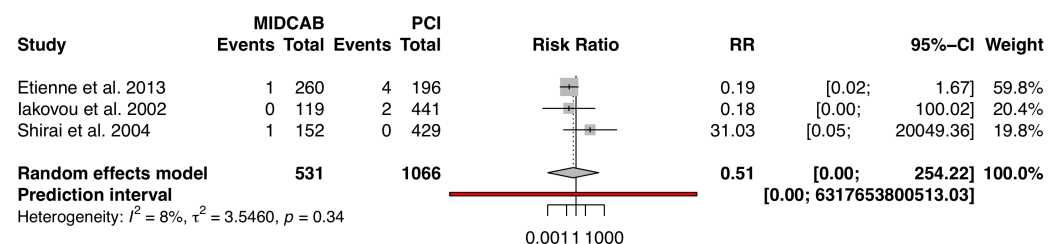

### Appendix 4.5 Mid-term myocardial infarction cohort studies

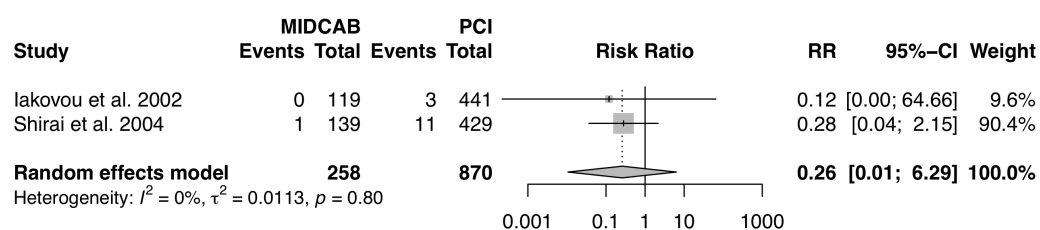

### Appendix 4.6 Long-term myocardial infarction cohort studies

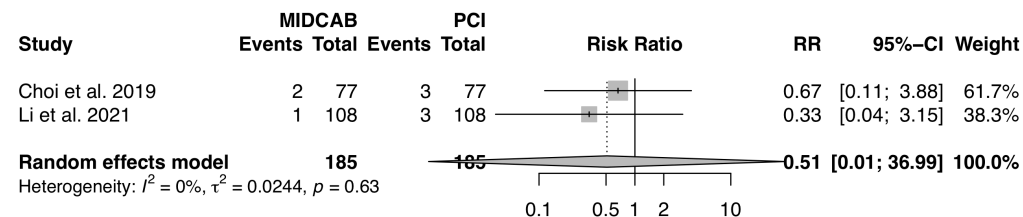

Supplement: mmc4.pdf [file mmc4.pdf]
